# Supplementary material
Source: PubMed Central journal article supplement (PMC3589894)
Supplement: Supp_Fig1.pdf [file Supp_Fig1.pdf]

## Supplementary Data

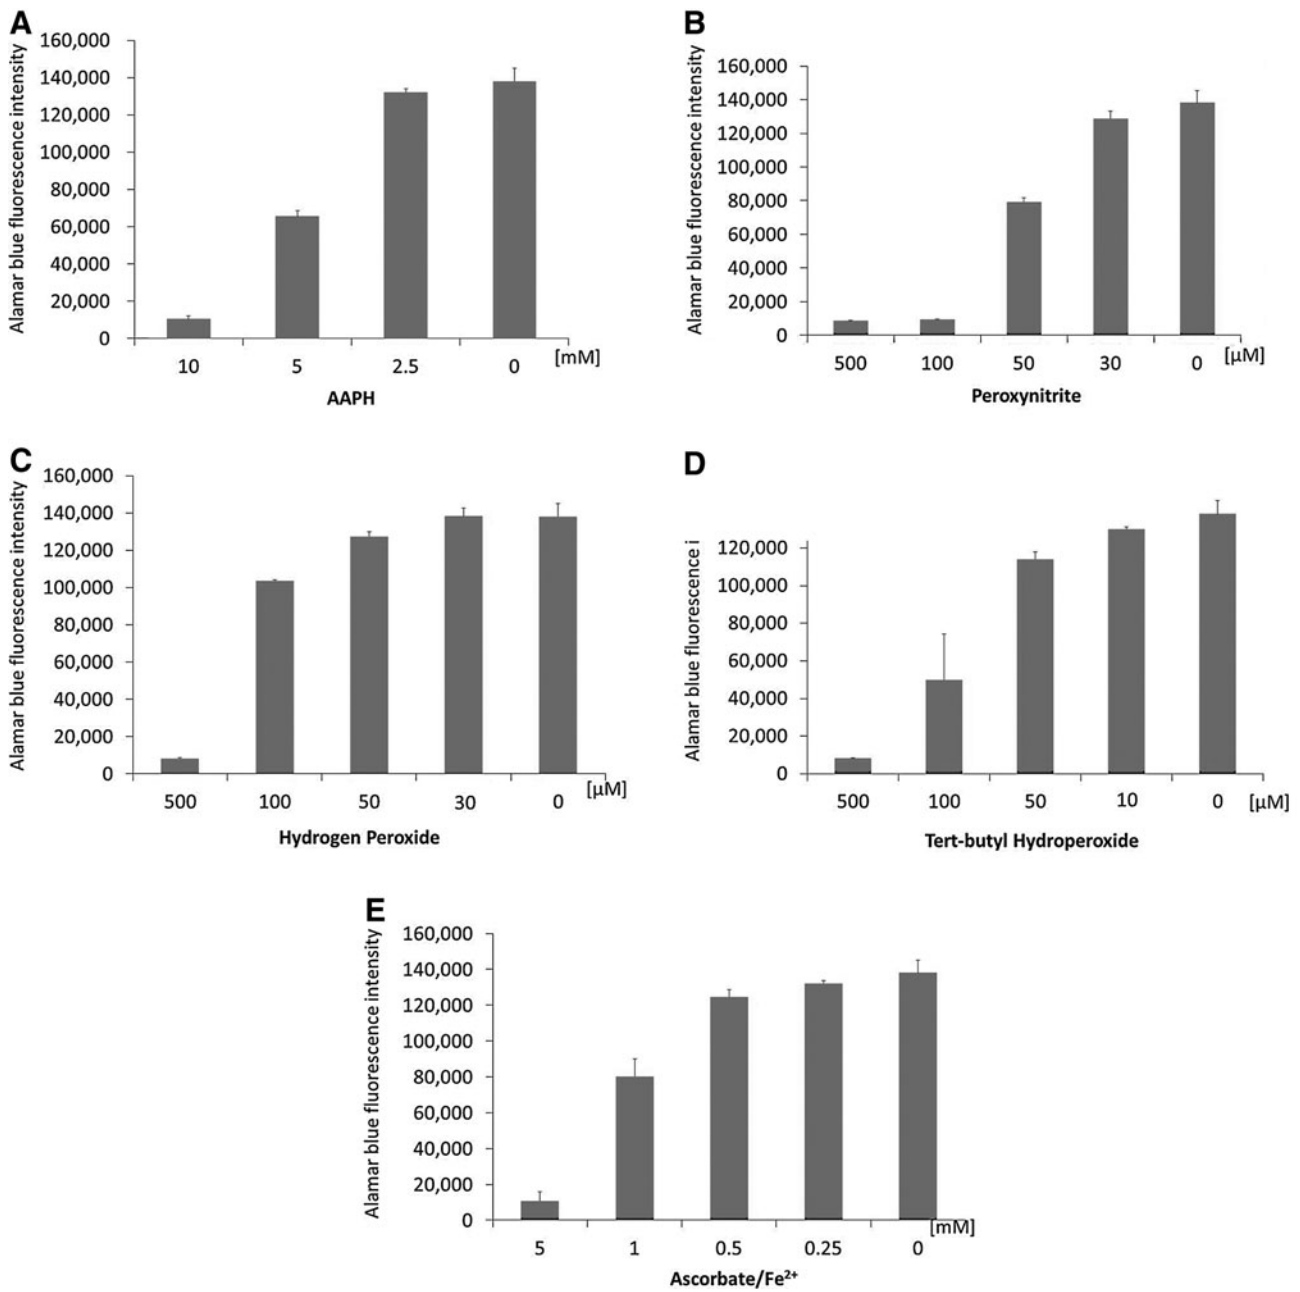

**SUPPLEMENTARY FIG. S1.** Effect of oxidizing agents on human mesenchymal stromal cell (hMSC) proliferation after 6 days. Effect of continuous exposure of 2,2'-azobis(2-amidino-propane) dihydrochloride (AAPH) (A), peroxynitrite (B), hydrogen peroxide (C), tert-butyl hydroperoxide (D), and the oxidizing system ascorbate/ $\text{Fe}^{2+}$  (E).
