# Supplementary material
Source: PubMed Central journal article supplement (PMC3589894)
Supplement: Supp_Fig2.pdf [file Supp_Fig2.pdf]

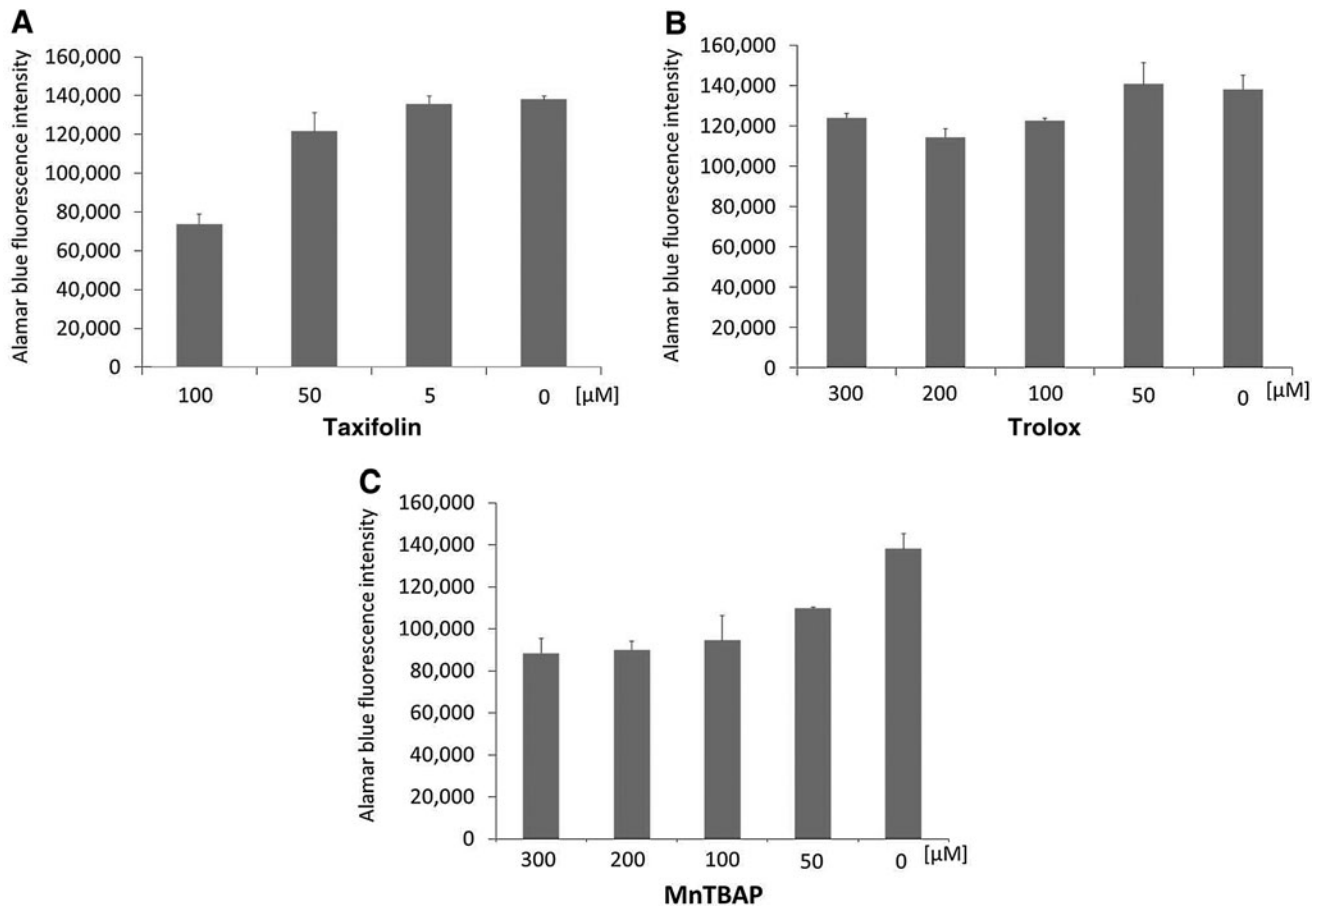

**SUPPLEMENTARY FIG. S2.** Effect of antioxidants/scavenger agents on hMSC proliferation after 6 days. Effect of continuous exposure of taxifolin (A), Trolox (B), manganese (III) tetrakis (4-benzoic acid) porphyrin chloride (MnTBAP) (C).
